# Supplementary material for: A systems medicine approach for finding target proteins affecting treatment outcomes in patients with non-Hodgkin lymphoma
Source: PubMed Central journal article supplement (PMC5593188; doi:10.1371/journal.pone.0183969), 2017-09-11

**A**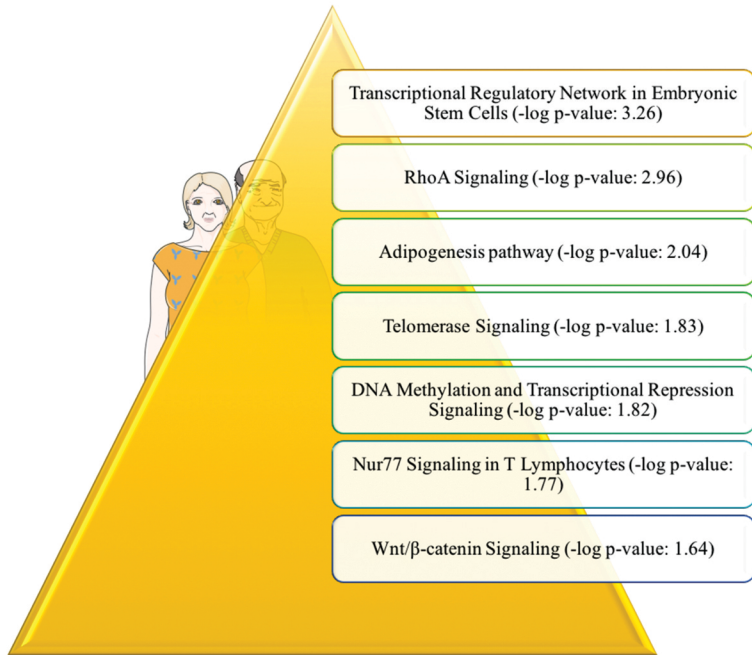**B**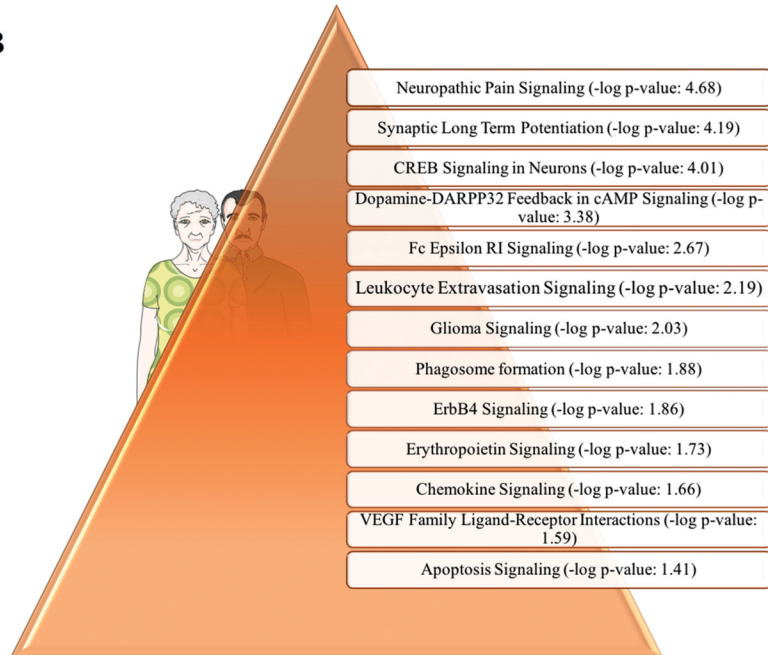

Supplement: pone.0183969.s003.pdf [file pone.0183969.s003.pdf]
